# Supplementary material
Source: Preprints.org preprint supplement (doi:10.20944/preprints202001.0156.v1)
Supplement: Supplementary file 1 [file supplementary]

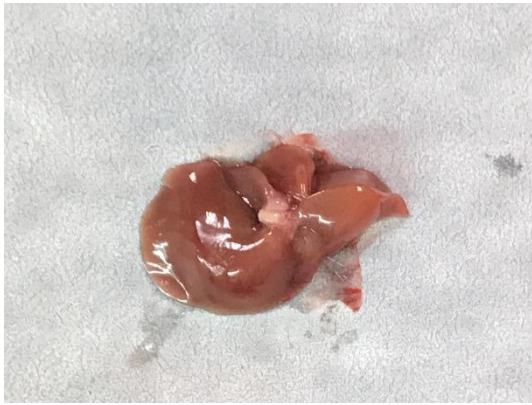

(a)

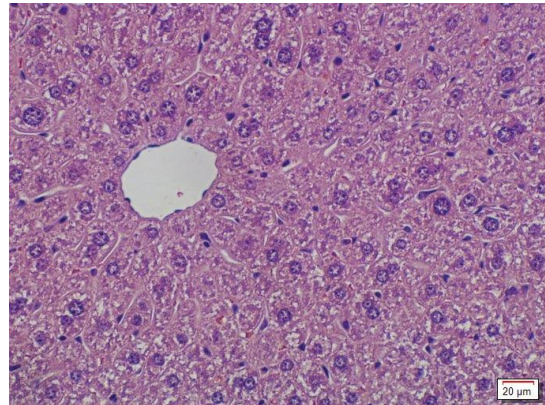

(e)

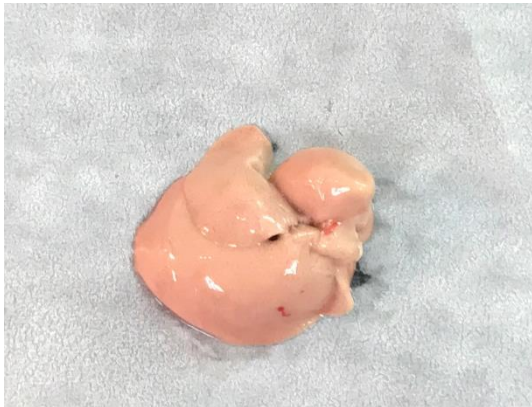

(b)

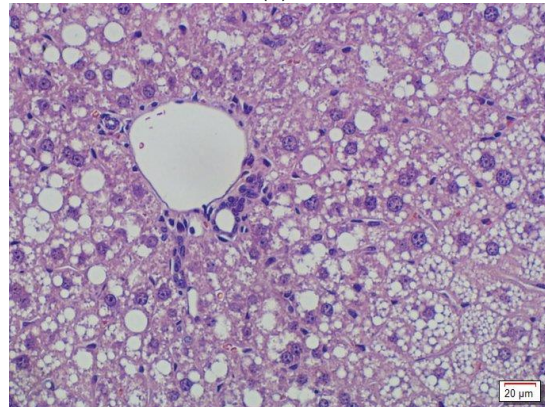

(f)

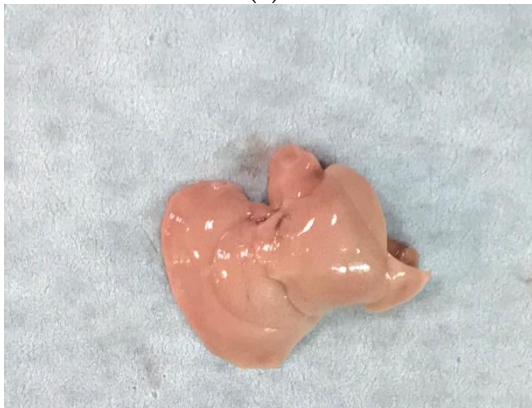

(c)

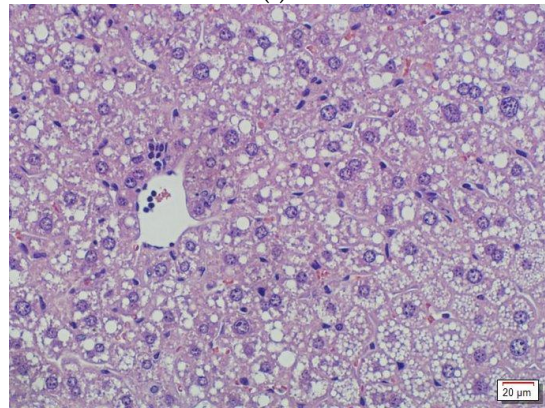

(g)

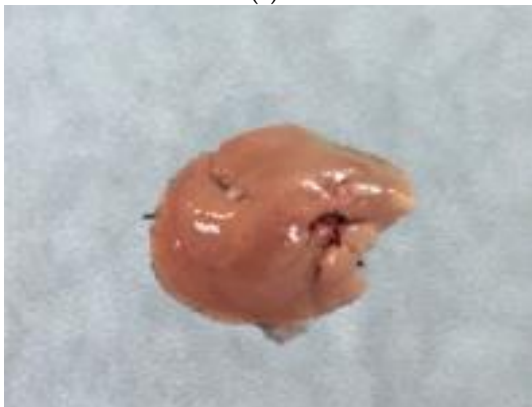

(d)

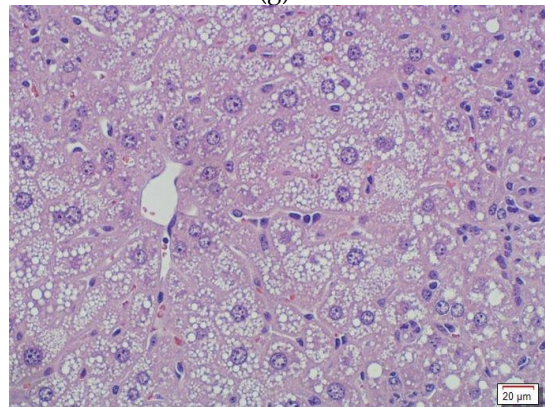

(h)

**Supplementary data 1**

Control group (a,e), HFHC group (b,f), HFHC + 0.05%deAND group (c,g), HFHC + 0.1%deAND group (d,h)

In experiment II, mice fed the HFHC diet caused liver hypertrophy and increased fat accumulation (especially cholesterol) and perivenular inflammatory infiltrates in liver. deAND treatment for 11 weeks ameliorated these alternations caused by HFHC diet.
